# Supplementary material for: Fluorine-free synthesis of ambient-stable delaminated Ti2CTx (MXene)
Source: Royal Society of Chemistry journal article supplement (doi:10.1039/d1ta09981g), 2022-01-01
Supplement: d1ta09981g1.pdf [file d1ta09981g1.pdf]

## Supporting Information

### Fluorine-Free synthesis of ambient-stable delaminated $\text{Ti}_2\text{C}_x$ (MXene)

Ni Xue, Xuesong Li, Liuyuan Han, He Zhu, Xiangyan Zhao, Ji Zhuang, Zeliang Gao and Xutang Tao\*

State Key Laboratory of Crystal Materials, Shandong University, Shandong 250100, China.

Email: txt@sdu.edu.cn

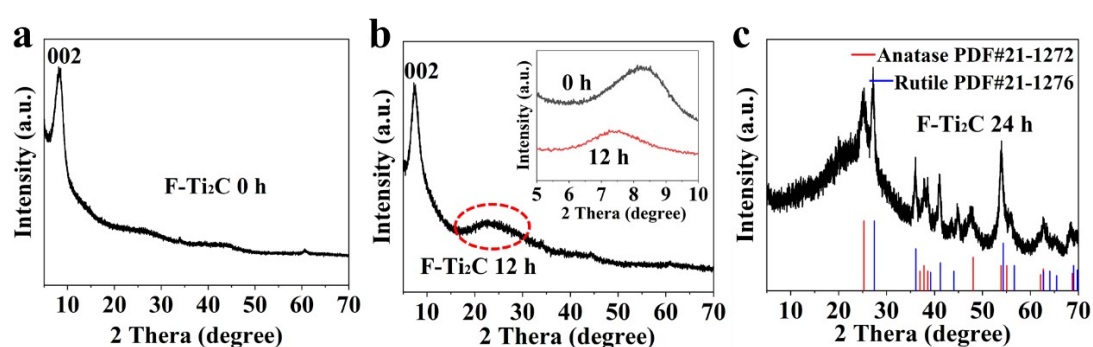

Fig. S1 XRD of F- $\text{Ti}_2\text{C}$  solution stored at room temperature for 0 h, 12 h and 24 h.

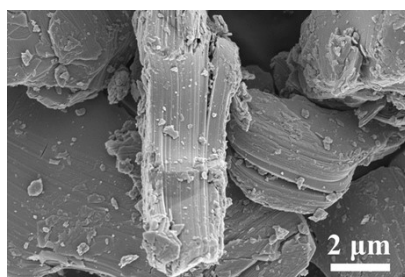

Fig S2. SEM of  $\text{Ti}_2\text{AlC}$ .

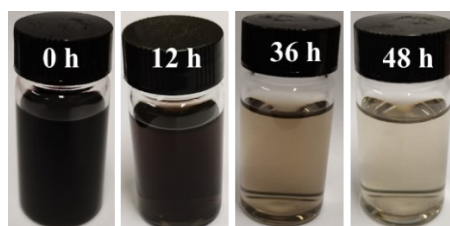

Fig. S3 Photograph of the F- $\text{Ti}_2\text{C}$  solution stored at low temperature (4  $^\circ\text{C}$ ) for 0 h, 12 h, 36 h and 48 h.

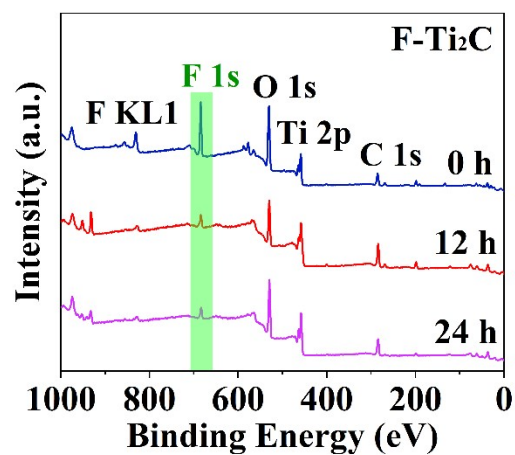

Fig. S4 XPS survey spectra of F-Ti<sub>2</sub>C.

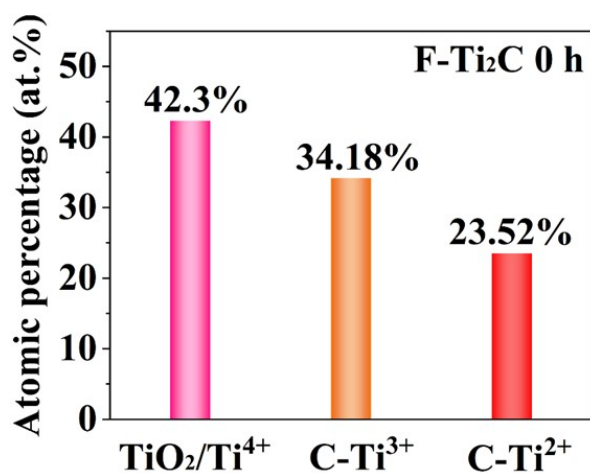

Fig. S5 The Ti 2p peak fitting results for F-Ti<sub>2</sub>C at 0 day.

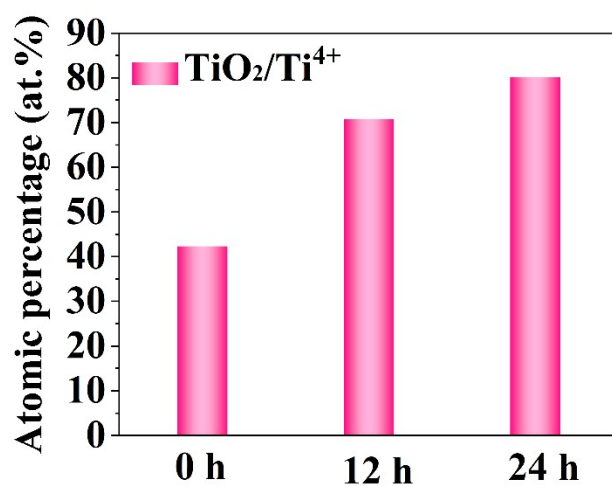

Fig. S6 The F-Ti<sub>2</sub>C XPS peak fitting results for the TiO<sub>2</sub>/Ti<sup>4+</sup>.

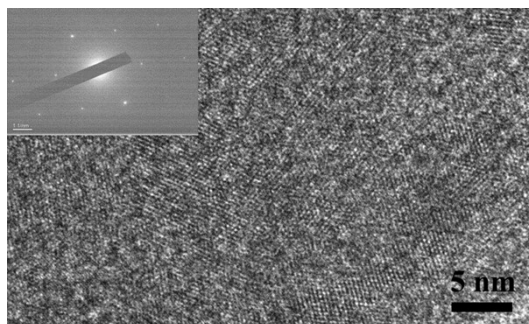

**Fig. S7** HR-TEM images of O-Ti<sub>2</sub>C, the inset is the selective area electron diffraction pattern.

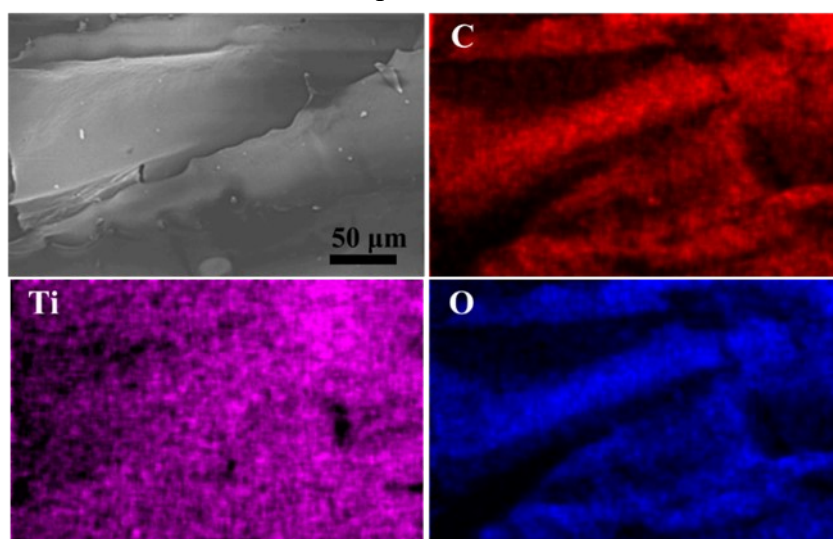

**Fig. S8** EDS element map scanning images of O-Ti<sub>2</sub>C.

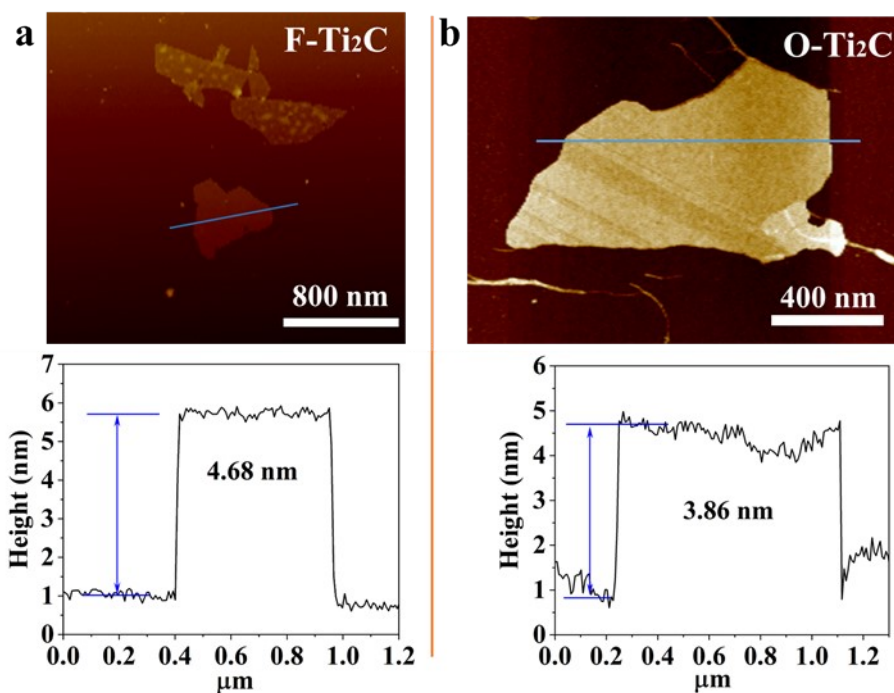

**Fig. S9** AFM image of F-Ti<sub>2</sub>C (a) and O-Ti<sub>2</sub>C (b).

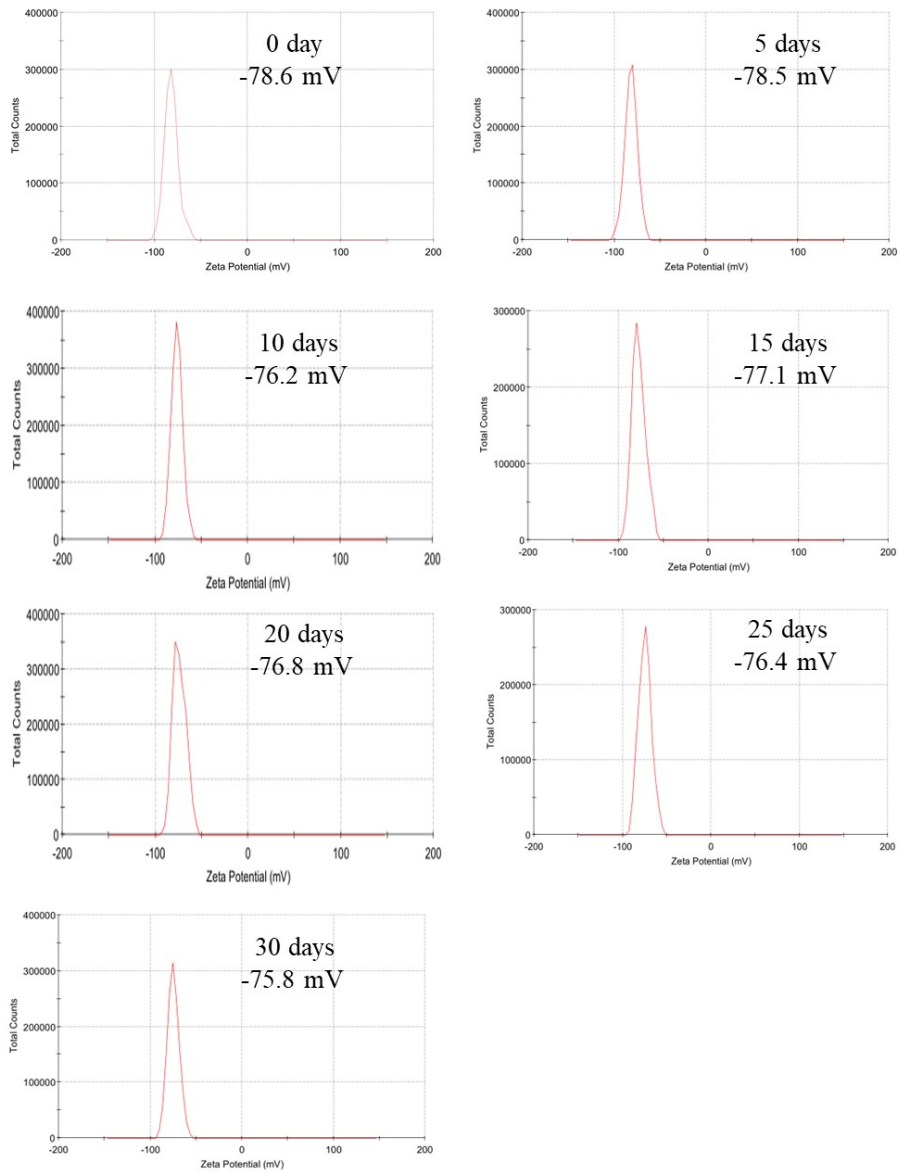

**Fig. S10** Zeta potential of O-Ti<sub>2</sub>C dispersion over time.

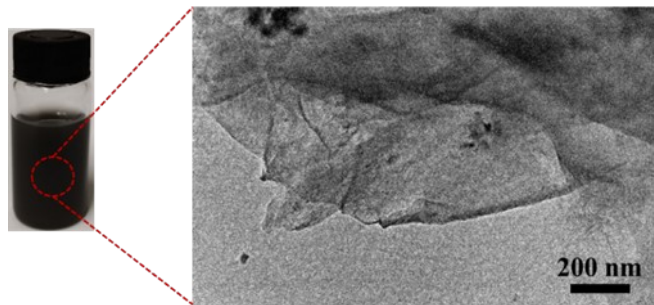

**Fig. S11** TEM of O-Ti<sub>2</sub>C solution stored for 30 days.

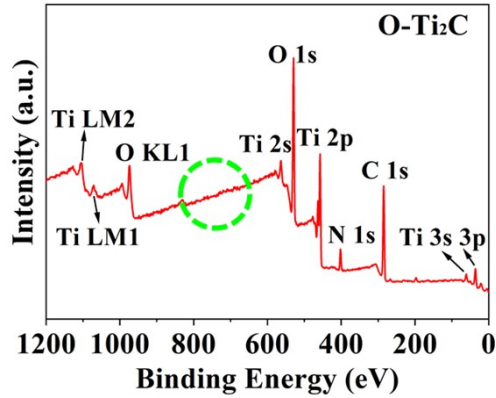

**Fig. S12** XPS survey spectra of O-Ti<sub>2</sub>C. The typical position of F 1s was marked by a green circle.

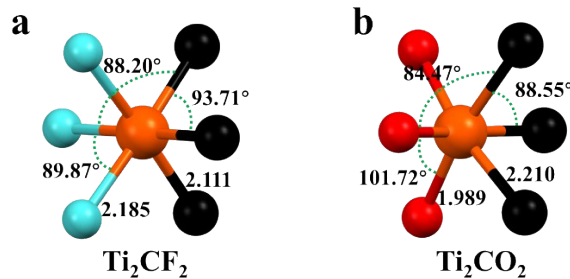

**Fig. S13** Structural models of Ti<sub>2</sub>CF<sub>2</sub> and Ti<sub>2</sub>CO<sub>2</sub>.

**Table S1.** Bader charge of Ti<sub>2</sub>CF<sub>2</sub> and Ti<sub>2</sub>CO<sub>2</sub> (T=F / O) monolayers in e<sup>a</sup>.

| Sample                          | Ti   | C      | T     |
|---------------------------------|------|--------|-------|
| Ti <sub>2</sub> CF <sub>2</sub> | 1.11 | -0.89  | -0.62 |
| Ti <sub>2</sub> CO <sub>2</sub> | 1.27 | -0.934 | -0.78 |

The positive/negative values represent positively/negatively charged, respectively. <sup>a</sup> the e represent 1 electron charge.

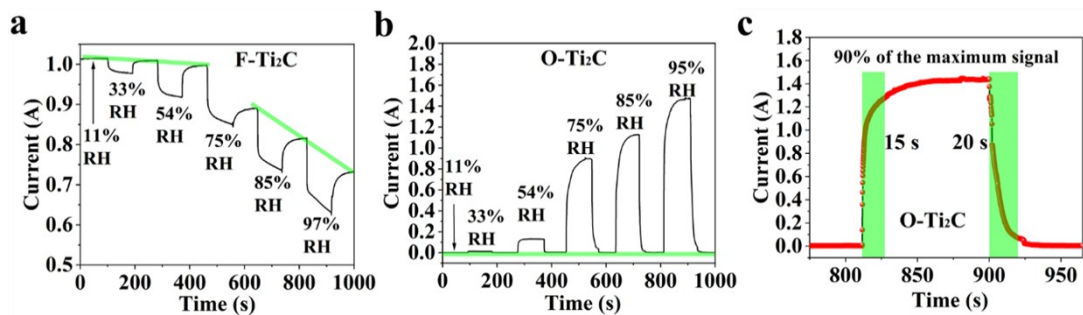

**Fig. S14** (a) Typical I-t characteristics of F-Ti<sub>2</sub>C sensor for various relative humidity. (b) Typical I-t characteristics of O-Ti<sub>2</sub>C sensor for various relative humidity. (c) Response and recovery time of O-Ti<sub>2</sub>C sensor between 11% RH and 97% RH at 25 °C.

**Table S2.** The comparison of humidity sensor performance of MXene.

| Sample                                                                        | Response | Response/recover time | Range    | References |
|-------------------------------------------------------------------------------|----------|-----------------------|----------|------------|
| PVA/MXene                                                                     | 40       | 0.9/6.3 s             | 11-97%RH | 1          |
| S-Ti <sub>3</sub> C <sub>2</sub>                                              | 12.8     | 6/2 s                 | 11-97%RH | 2          |
| Ti <sub>3</sub> C <sub>2</sub> /K <sub>2</sub> Ti <sub>4</sub> O <sub>9</sub> | 1.5      | 65.2/84.8 s           | 11-97%RH | 3          |
| Alkalized Ti <sub>3</sub> C <sub>2</sub>                                      | 300      | 1/201 s               | 11-97%RH | 4          |
| O-MXene                                                                       | 1450     | 15/20 s               | 11-97%RH | This work  |

**Supplementary References:**

1. D. Wang, D. Zhang, P. Li, Z. Yang, Q. Mi and L. Yu, *Nano-Micro Lett.*, 2021, **13**.
2. R. Li, Y. Fan, Z. Ma, D. Zhang, Y. Liu and J. Xu, *Mikrochim. Acta*, 2021, **188**, 81.
3. J. Wu, P. Lu, J. Dai, C. Zheng, T. Zhang, W. W. Yu and Y. Zhang, *Sensor. Actuat. B: Chem.*, 2021, **326**, 128969.
4. Z. Yang, A. Liu, C. Wang, F. Liu, J. He, S. Li, J. Wang, R. You, X. Yan, P. Sun, Y. Duan and G. Lu, *ACS Sens.*, 2019, **4**, 1261-1269.
